# Supplementary material
Source: Research Square preprint supplement (doi:10.21203/rs.3.rs-9117332/v1)
Supplement: Supplementary file 1 [file 4e28171b354d34874d64feac.docx]

*Supplementary Material*

Phenolic Profile Characterization of Extra Virgin Olive Oils from the Omani Market Using a Salt-Assisted Extraction and LC-MS/MS Approach

Azza A.H. Al Shamli¹, Maryam Mousavizadegan¹, Haider A. J. Al Lawati¹*

a Department of Chemistry, College of Science, Sultan Qaboos University, P.O. Box 36, Al Khoud 123, Muscat, Oman

*Corresponding author

Haider A. J. Al Lawati
Department of Chemistry
College of Science
Sultan Qaboos University
P.O. Box 36, Al Khoud 123
Muscat, Oman
Email: haiderl@squ.edu.om
Tel: +968 24141481

Table S1: LC gradient elution program (A, methanol; B, water).

| Time (min) | A (%) | B (%) |
| --- | --- | --- |
| 1.00 | 2 | 98 |
| 6.00 | 55 | 45 |
| 18.00 | 80 | 20 |
| 19.00 | 100 | 0 |
| 19.30 | 2 | 98 |


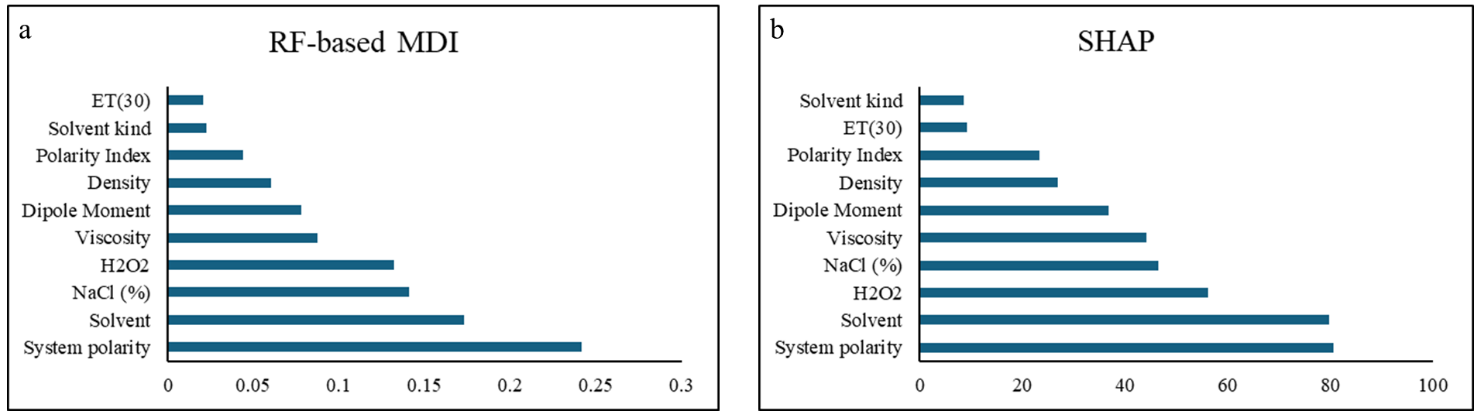


Figure S1: Feature importance through RF-based MDI and SHAP approach.

A.

B.

C.

D.

E.

F.

G.

H.

I.

J.

Figure S2: MS/MS spectra of A) p-coumaric acid, B) hydroxytyrosol, C) tyrosol, D) oleacein, E) pinoresinol, F) oleocanthal, G) luteolin, H) apigenin, I)diosmetin, J) oleuropein.
